# Supplementary material for: American Society of Anesthesiologists Physical Status Classification as a reliable predictor of postoperative medical complications and mortality following ambulatory surgery: an analysis of 2,089,830 ACS-NSQIP outpatient cases
Source: PubMed Central journal article supplement (PMC8140433; doi:10.1186/s12893-021-01256-6), 2021-05-21
Supplement: 12893_2021_1256_MOESM2_ESM.pdf [file 12893_2021_1256_MOESM2_ESM.pdf]

Table 2. Demographic, Surgical Characteristics and Anesthesia Type by Mortality in Patients who Underwent Outpatient Surgery

|                                      | <b>Cases with No Death<br/>(n=2088129)</b> | <b>Cases with Death<br/>(n=1701)</b> | <b>All Cases</b>       | <b>P Value</b> | <b>%TC</b> |
|--------------------------------------|--------------------------------------------|--------------------------------------|------------------------|----------------|------------|
| <b>Age, (y), mean ±SD</b>            | 51.8 ± 16.48                               | 69.0 ± 14.68                         | 51.8 ± 16.49           | <.001          |            |
| <b>Operative Time, (m), mean ±SD</b> | 69.8 ± 54.05                               | 83.9 ± 78.08                         | 69.8 ± 54.07           | <.001          |            |
| <b>RVU, mean ±SD</b>                 | 13.6 ± 8.75                                | 16.7 ± 14.28                         | 13.6 ± 8.76            | <.001          |            |
| Female                               | 58.7 (1224789/2086936)                     | 43.0 (731/1701)                      | 58.7 (1225520/2088637) | <.001          | 0.06       |
| Male                                 | 41.3 (862147/2086936)                      | 57.0 (970/1701)                      | 41.3 (863117/2088637)  | <.001          | 0.11       |
| <b>Race, % (n)</b>                   |                                            |                                      |                        |                |            |
| White                                | 84.6 (1547945/1830672)                     | 86.0 (1357/1578)                     | 84.6 (1549302/1832250) | 0.114          | 0.09       |
| Black                                | 10.6 (194022/1830672)                      | 10.8 (171/1578)                      | 10.6 (194193/1832250)  | 0.759          | 0.09       |
| Asian                                | 3.2 (58090/1830672)                        | 2.3 (36/1578)                        | 3.2 (58126/1832250)    | 0.043          | 0.06       |
| Other                                | 1.7 (30615/1830672)                        | 0.9 (14/1578)                        | 1.7 (30629/1832250)    | 0.015          | 0.05       |
| <b>Smoker, % (n)</b>                 | 17.5 (365709/2088118)                      | 19.4 (330/1701)                      | 17.5 (366039/2089819)  | 0.041          | 0.09       |
| <b>Diabetes, % (n)</b>               | 10.7 (224235/2088126)                      | 28.2 (480/1701)                      | 10.8 (224715/2089827)  | <.001          | 0.21       |
| <b>Dyspnea, % (n)</b>                | 4.3 (89438/2088121)                        | 20.2 (344/1701)                      | 4.3 (89782/2089822)    | <.001          | 0.38       |
| <b>Obesity, % (n)</b>                | 40.4 (830109/2057075)                      | 34.5 (563/1633)                      | 40.4 (830672/2058708)  | <.001          | 0.07       |
| <b>COPD, % (n)</b>                   | 2.6 (53170/2088125)                        | 14.9 (254/1701)                      | 2.6 (53424/2089826)    | <.001          | 0.48       |
| <b>Bleeding disorder, % (n)</b>      | 1.8 (38479/2088126)                        | 13.5 (230/1701)                      | 1.9 (38709/2089827)    | <.001          | 0.59       |
| <b>Hypertension, % (n)</b>           | 35.3 (736022/2088126)                      | 69.1 (1175/1701)                     | 35.3 (737197/2089827)  | <.001          | 0.16       |
| ASA PS 1                             | 15.9 (332204/2088129)                      | 1.2 (20/1701)                        | 15.9 (332224/2089830)  | <.001          | 0.01       |
| ASA PS 2                             | 56.4 (1177762/2088129)                     | 17.2 (293/1701)                      | 56.4 (1178055/2089830) | <.001          | 0.02       |
| ASA PS 3                             | 26.1 (543933/2088129)                      | 53.3 (906/1701)                      | 26.1 (544839/2089830)  | <.001          | 0.17       |
| ASA PS 4                             | 1.6 (34230/2088129)                        | 28.3 (482/1701)                      | 1.7 (34712/2089830)    | <.001          | 1.39       |
| <b>Surgical Specialty, % (n)</b>     |                                            |                                      |                        |                |            |

|                               |                        |                  |                        |       |      |
|-------------------------------|------------------------|------------------|------------------------|-------|------|
| General surgery               | 59.9 (1251680/2088129) | 55.6 (946/1701)  | 59.9 (1252626/2089830) | <.001 | 0.08 |
| Gynecology                    | 7.9 (165897/2088129)   | 2.4 (40/1701)    | 7.9 (165937/2089830)   | <.001 | 0.02 |
| Orthopedics                   | 14.3 (298057/2088129)  | 6.9 (118/1701)   | 14.3 (298175/2089830)  | <.001 | 0.04 |
| ENT                           | 4.4 (91856/2088129)    | 3.1 (52/1701)    | 4.4 (91908/2089830)    | 0.007 | 0.06 |
| Plastic surgery               | 4.5 (94525/2088129)    | 1.6 (27/1701)    | 4.5 (94552/2089830)    | <.001 | 0.03 |
| Urology                       | 5.3 (111517/2088129)   | 12.6 (215/1701)  | 5.4 (111732/2089830)   | <.001 | 0.19 |
| Vascular                      | 3.6 (74597/2088129)    | 17.8 (303/1701)  | 3.6 (74900/2089830)    | <.001 | 0.40 |
| <b>Anesthesia Type, % (n)</b> |                        |                  |                        |       |      |
| General Anesthesia            | 89.1 (1861289/2088129) | 80.8 (1374/1701) | 89.1 (1862663/2089830) | <.001 | 0.07 |
| Neuroaxial/Regional           | 2.1 (43749/2088129)    | 3.4 (58/1701)    | 2.1 (43807/2089830)    | <.001 | 0.13 |
| MAC/IV Sedation/Local         | 8.8 (183091/2088129)   | 15.8 (269/1701)  | 8.8 (183360/2089830)   | <.001 | 0.15 |

\*  $\chi^2$  test was used for binary variables, independent sample t-test was used for continuous variables.

ASA PS = American Society of Anesthesiologists physical status classification system, COPD = chronic obstructive pulmonary disease, ENT = ear, nose and throat, IV = intravenous, MAC = monitored *anesthesia* care, TC = percent of total with complications, RVU = relative value units. **Outpatient surgery defined as length of stay = 0 days.**
