# Supplementary material for: American Society of Anesthesiologists Physical Status Classification as a reliable predictor of postoperative medical complications and mortality following ambulatory surgery: an analysis of 2,089,830 ACS-NSQIP outpatient cases
Source: PubMed Central journal article supplement (PMC8140433; doi:10.1186/s12893-021-01256-6), 2021-05-21
Supplement: 12893_2021_1256_MOESM3_ESM.pdf [file 12893_2021_1256_MOESM3_ESM.pdf]

Table 3. Multivariable Logistic Regression Analysis for Medical Complications, Mortality and Readmissions for Z Scores of ASA physical status shown by Surgical Specialty **in Patients who Underwent Outpatient Surgery**

|                              | # Events | Total n, (%)   | Odds Ratio (95% CI)* | P Value* |
|------------------------------|----------|----------------|----------------------|----------|
| <b>Medical Complications</b> |          |                |                      |          |
| General Surgery              | 11661    | 1252626 (0.93) | 1.38 (1.36, 1.42)    | <.0001   |
| Gynecology                   | 4295     | 165937 (2.59)  | 1.14 (1.09, 1.17)    | <.0001   |
| Orthopedics                  | 2029     | 298175 (0.68)  | 1.21 (1.15, 1.27)    | <.0001   |
| ENT                          | 594      | 91908 (0.65)   | 1.38 (1.26, 1.51)    | <.0001   |
| Plastic Surgery              | 543      | 94552 (0.57)   | 1.17 (1.06, 1.28)    | 0.0012   |
| Urology                      | 4120     | 111732 (3.69)  | 1.07 (1.04, 1.11)    | <.0001   |
| Vascular                     | 1535     | 74900, (2.05)  | 1.26 (1.19, 1.32)    | <.0001   |
| <b>Death</b>                 |          |                |                      |          |
| General Surgery              | 946      | 1252626 (0.08) | 2.04 (1.89, 2.19)    | <.0001   |
| Gynecology                   | 40       | 165937 (0.02)  | 1.67 (1.19, 2.35)    | 0.0033   |
| Orthopedics                  | 118      | 298175 (0.04)  | 1.77 (1.43, 2.18)    | <.0001   |
| ENT                          | 52       | 91908 (0.06)   | 2.03 (1.50, 2.75)    | <.0001   |
| Plastic Surgery              | 27       | 94552 (0.03)   | 1.76 (1.17, 2.66)    | 0.0070   |
| Urology                      | 215      | 111732 (0.19)  | 1.98 (1.70, 2.30)    | <.0001   |
| Vascular                     | 303      | 74900 (0.40)   | 1.44 (1.27, 1.64)    | <.0001   |
| <b>Readmission</b>           |          |                |                      |          |
| General Surgery              | 23334    | 893472 (2.61)  | 1.29 (1.27, 1.31)    | <.0001   |
| Gynecology                   | 3359     | 153669 (2.19)  | 1.19 (1.15, 1.23)    | <.0001   |
| Orthopedics                  | 3327     | 266932 (1.25)  | 1.29 (1.24, 1.35)    | <.0001   |
| ENT                          | 1834     | 80602 (2.28)   | 1.22 (1.16, 1.28)    | <.0001   |
| Plastic Surgery              | 1809     | 83717 (2.16)   | 1.25 (1.19, 1.31)    | <.0001   |

|          |      |               |                   |        |
|----------|------|---------------|-------------------|--------|
| Urology  | 4333 | 100097 (4.33) | 1.23 (1.19, 1.27) | <.0001 |
| Vascular | 2874 | 52750 (5.45)  | 1.14 (1.10, 1.19) | <.0001 |

\* Results based on multivariable logistic regression adjusted for gender, smoker, diabetes, dyspnea, obesity, COPD, bleeding disorder, hypertension required medication, operative duration, and RVU.

ASA = American Society of Anesthesiologists, ENT = ear, nose and throat. **Outpatient surgery defined as length of stay = 0 days.**
