# Supplementary material for: American Society of Anesthesiologists Physical Status Classification as a reliable predictor of postoperative medical complications and mortality following ambulatory surgery: an analysis of 2,089,830 ACS-NSQIP outpatient cases
Source: PubMed Central journal article supplement (PMC8140433; doi:10.1186/s12893-021-01256-6), 2021-05-21
Supplement: 12893_2021_1256_MOESM4_ESM.pdf [file 12893_2021_1256_MOESM4_ESM.pdf]

Table 4. Multivariable Logistic Regression Analysis for Medical Complications, Mortality and Readmissions of ASA physical status Z Scores for the 3 Most Common Current Procedural Terminology Codes **in Patients who Underwent Outpatient Surgery**

|                              | <b>CPT code</b> | <b># Events</b> | <b>Total n, %</b> | <b>Odds Ratio (95% CI)*</b> | <b>P Value*</b> |
|------------------------------|-----------------|-----------------|-------------------|-----------------------------|-----------------|
| <b>Medical Complications</b> |                 |                 |                   |                             |                 |
| Laparoscopic Cholecystectomy | 47562           | 1662            | 164168, (1.01)    | 1.46 (1.38, 1.54)           | <.0001          |
| Inguinal Hernia              | 49505           | 744             | 126974, (0.59)    | 1.65 (1.52, 1.79)           | <.0001          |
| Laparoscopic Appendectomy    | 44970           | 1343            | 98715, (1.36)     | 1.18 (1.11, 1.26)           | <.0001          |
| <b>Death</b>                 |                 |                 |                   |                             |                 |
| Laparoscopic Cholecystectomy | 47562           | 97              | 164168, (0.06)    | 2.24 (1.79, 2.81)           | <.0001          |
| Inguinal Hernia              | 49505           | 89              | 126974, (0.07)    | 2.56 (2.02, 3.24)           | <.0001          |
| Laparoscopic Appendectomy    | 44970           | 8               | 98715, (0.01)     | 3.63 (1.84, 7.13)           | 0.0002          |
| <b>Readmission</b>           |                 |                 |                   |                             |                 |
| Laparoscopic Cholecystectomy | 47562           | 3403            | 118451, (2.87)    | 1.2678 (1.21, 1.32)         | <.0001          |
| Inguinal Hernia              | 49505           | 1205            | 84634, (1.42)     | 1.84 (1.72, 1.97)           | <.0001          |
| Laparoscopic Appendectomy    | 44970           | 1814            | 81324, (2.23)     | 1.20 (1.14, 1.27)           | <.0001          |

\*Results based on multivariable logistic regression adjusted for gender, smoker, diabetes, dyspnea, obesity, COPD, bleeding disorder, hypertension required medication, operative duration, and RVU.

ASA = American Society of Anesthesiologists, CPT = Current Procedural Terminology, CI = Confidence interval

**Outpatient surgery defined as length of stay = 0 days.**
